## Neuroblastoma in Adults: A Scoping Review of Presentations, Genetics and Therapies

Bader H. Alsaikhan, MD, MSc, FRCSC<sup>1,2,3</sup>; Basmah Alwahhabi, MBBS, FRCP(UK)<sup>4</sup>; Abdullah Alshalan, MD<sup>5</sup>; Alex Koziarz, MD, MSc<sup>6</sup>; Abdullah M. Alkhayal, MD, FRCSC<sup>1,2,3</sup>; Khalid Alrabeeah, MD, FRCSC<sup>1,2,3</sup>

1. College of Medicine, King Saud bin Abdulaziz University for Health Sciences, Riyadh, Saudi Arabia.
2. King Abdullah International Medical Research Centre (KAIMARC), Riyadh, Saudi Arabia.
3. Division of Urology, Department of Surgery, King Abdulaziz Medical City, National Guard Health Affairs (MNGHA), Riyadh, Saudi Arabia.
4. Department of Medicine, King Abdullah bin Abdulaziz University Hospital, Riyadh, Saudi Arabia.
5. Department of Surgery, Division of Urology, King Abdulla bin Abdulaziz University Hospital, Riyadh Saudi Arabia.
6. Department of Radiology, McMaster University, Hamilton, Ontario, Canada.

### Take home messages

- 679 cases of adult neuroblastoma have been published in the literature.
- Compared to pediatrics, adult cases have more somatic mutations (eg: *ALK*, *ATRX*).
- Registry data showed that adult neuroblastoma has a 5-year survival of 36%.

### Co-Investigators:

Bader H. Alsaikhan, MD, MSc, FRCSC  
Alex Koziarz, MD, MSc

### Correspondence:

Bader H. Alsaikhan, MD, MSc, FRCSC  
Assistant Professor  
Division of Urology  
King Saud bin Abdulaziz University for Health Sciences  
King Abdullah International Medical Research Centre  
National Guard Health Affairs (MNGHA)  
Riyadh, Saudi Arabia  
Tel: +966 56 309 2222  
Email: [alsaikhanba@mngha.med.sa](mailto:alsaikhanba@mngha.med.sa)

Acknowledgements: none.

Conflicts of interest: none.

Financial disclosures: none.

Funding/support: none.

## ABSTRACT

**Purpose:** As a scoping review, evaluate the literature on the presentations, genetics, and therapies for neuroblastoma in adult patients.

**Methods:** We searched four databases for studies reporting adults with neuroblastoma. Cohort studies, case series, and case reports were synthesized qualitatively. Progression-free and overall survival were compared amongst cohort studies.

**Results:** Of 2287 unique records, 136 studies published in 141 articles were included. A total of 679 patients were included. On review of individual patient-level data, the adrenal gland and retroperitoneum were the most common primary site (47.3%). *MYCN* was rarely amplified: seven studies reported zero patients with *MYCN* amplified, two studies with a single patient, and one study with 3/7 patients. Adult patients appear to show a high frequency of somatic mutations, specifically *ALK* (42%) and *ATRX* (58%). Registry data of included studies showed 5-year overall survival to be 36.3% in adults aged  $\geq 20$  years.

**Conclusion:** Of nearly 700 cases of adult neuroblastoma published in the literature, the most common primary site is the adrenals or retroperitoneum. Relative to pediatric cases, adult cases demonstrate a considerable rate of somatic mutations such as *ALK* and *ATRX*. Registry data showed 5-year survival of 36%. Future studies evaluating targeted therapies in larger samples are needed.

**Keywords:** adult; cancer; genetics; kidney; neuroblastoma; survival

## **Introduction**

Neuroblastoma is the most common extracranial solid tumor of childhood [1]. Unfortunately, over half of the children have metastatic disease on presentation. Neuroblastoma arises from cells of the neural crest that form the sympathetic ganglia and adrenal medulla. Tumors may occur anywhere along the sympathetic chain within the neck, thorax, retroperitoneum, or pelvis, or in the adrenal gland. The most common primary site includes the adrenal gland [1].

The occurrence of neuroblastoma is common in children however very rare in adults. Neuroblastoma is highly malignant, usually characterized by invasive growth and propensity for organ metastasis. The prognosis of adult patients with neuroblastoma is generally poor, and management is similar compared to the pediatric population.

The literature describing neuroblastoma is scattered with few cohort studies and countless case reports. Previously literature reviews include only a small fraction of the published cases, which may produce inaccurate summaries of the presentation, management, and prognosis. Therefore, we performed a scoping review with the aim to summarize all published reports of neuroblastoma in adults to inform clinicians of the available evidence of this heterogeneous disease.

## **Methods**

We performed this scoping review in an attempt to summarize the available literature on the presentations, genetics, and therapies for neuroblastoma in adult patients. All patients were required to be  $\geq 18$  years old and have a pathologic diagnosis of neuroblastoma. Studies were excluded if the primary site was intracranial, cutaneous, or in the extremities. We also excluded cases of olfactory neuroblastoma (esthesioneuroblastoma) and if only ganglioneuroblastoma were reported. If studies included a combination of neuroblastoma and ganglioneuroblastoma,

we attempted to describe them separately. The following databases were searched for randomized controlled trials, observational studies, case series, and case reports: Medline, Embase, CINAHL, Web of Science. We used a combination of key word and medical subject headings such as ‘neuroblastoma’, ‘adult’, ‘geriatric’ from inception to 4 October 2022 (Medline strategy found in **Table A1**). There was no limitation on language or publication type (full text article or published conference abstract). The search was current until 7 October 2022. References of all included studies were reviewed to identify studies not captured in the search of databases. Research ethics board approval was not required as all data was published and publicly available.

Studies were screened by a single investigator and reviewed by a second investigator for inclusion. All studies were reported qualitatively and categorized according to study design (cohort study, case series, case report). We aimed to identify the total number of published unique cases of adult neuroblastoma. We also aimed to report patient ages, genders, and primary tumor sites. For cohort studies with sufficient data, we reported relevant genetic abnormalities (eg, *MYCN* amplification, *ALK* or *ATRX* mutations), management strategies, and progression-free and overall survival.

In addition, we described a case of neuroblastoma in a 24-year-old male patient managed at King Abdullah University Hospital (Riyadh, Saudi Arabia).

## **Results**

### ***Scoping Review***

#### *Characteristics of included studies (number, study design, age, sex)*

Our initial literature search identified 2287 unique articles, of which 101 were included following full text review. Forty articles were identified through manual searching of references

of included articles. Accordingly, a total of 136 studies published in 141 articles were included in the scoping review (**Figure 1; Table 1**). **Table 2** details the genetic characteristics of neuroblastoma tumors of included studies. There were 6 cohort studies [2-7], 28 case series (**Table 3**) [11-38], and 102 case reports (**appendix Table A2**) [appendix references A1-A102]. The total number of adult neuroblastoma cases was 679. Five articles included overlapping patients [8-10,39,40], but were still included as they provided different information. For cohort studies, male proportion ranged between 44% [6] to 59% [2]. Rogowitz and colleagues [5] reported the largest study, documenting 216 adult neuroblastoma cases sourced from the Surveillance, Epidemiology, and End-Results (SEER) registry (1973-2010). Of these 216 patients, 35 (16%) were over 60 years old.

#### *Primary site of tumor*

In the largest series [5], the most common primary tumor site in patients aged 18-60 years was the central nervous system (39%, not reported if this included sympathetic ganglia), followed by the retroperitoneum (17%), and endocrine tissues including thymus (14%). Suzuki and colleagues reported a series of 44 patients from Italy, whereby the most common primary site was adrenal gland (26/44, 59%), followed by the abdominal paraspinal region (11/44, 25%), and mediastinum (5/44, 11%). Tang and colleagues [2] reported a series of 27 patients published in 1975, of which 15 patients had a primary site identified. The most common primary site was the mediastinum (7/15, 47%), followed by the retroperitoneum (5/15, 33%). Notably, 12 patients were unable to have a primary site identified given multiple sites involved. Sorrentino and colleagues [6] report a series of 16 patients from Italy, of which the adrenal gland (5/16, 31%), and abdomen (5/16, 31%) were the commonest primary site, followed by the pelvis (4/16, 27%), and thorax (2/16, 13%). When totaling patients included in included case series (n=131), the

most commonly reported site included the retroperitoneum not otherwise specified (n=38, 29%), followed by adrenal gland (n=24, 18%), pelvis (n=16, 12%), abdomen not otherwise specified (n=12, 9%), and mediastinum (n=11, 8%). If the primary sites of adrenal gland and retroperitoneum were combined, this site would total 47.3% (62/131) of patients.

### *Genetics*

*MYCN* amplification occurred rarely in included studies of tested adult neuroblastoma patients: 0/22 patients in Kushner and colleagues [29], 0/5 in Podda and colleagues [31], 1/7 in Berbegall and colleagues [33], 0/40 in Suzuki and colleagues [7], 0/9 in Polishchuk and colleagues [3], 0/3 in Mazzocco and colleagues [36], and 1/10 in Sorrentino and colleagues [6]. The patient with *MYCN* amplification in Sorrentino and colleagues [6] was a 30-year-old female who presented with adrenal neuroblastoma with metastasis to the liver, and underwent radical tumor resection followed by cisplatin and three courses of peptichemio; she unfortunately died 10 months after initial presentation. Also in this study, one of five patients presented with 1p chromosome deletion. This was a 27-year-old male who presented with a neuroblastoma primary in the thorax with metastasis to bone. He underwent four courses of carboplatin and etoposide chemotherapy, and four courses of etoposide alone. He had a minor response but showed local and bone progression at 13 months and died 38 months following initial presentation.

Suzuki and colleagues reported a series of 44 patients [7], whereby somatic *ATRX* mutations or deletions were identified in 58% (15/26) of tested tumors and somatic *ALK* mutations were identified in 42% (10/16) of tested tumors. A proportion of this cohort underwent targeted exome sequencing at initial diagnosis (3/11) or relapse (8/11), which found a greater variety of mutations and total number of mutations at relapse. One patient had targeted exome sequencing performed both at initial diagnosis and at relapse: initial sequencing showed *CSF1R*

V32G mutation, relapse sequencing showed *CRLF2* deletion (Xp22.33) in addition to two other mutations (*FAT1* deletion (4q35.2), *NUP93* S654G).

### *Management and outcomes*

The management of neuroblastoma varied according to extent of disease. Sorrentino and colleagues [6] reported a cohort of 16 patients: 4 patients were stage 1 or 2 and all underwent surgery except for 1 patient who also had chemotherapy; 6 patients were stage 3, and underwent various combinations of surgery, chemotherapy, and radiation, one of whom underwent surgery only but had bone relapse at 5 months; 6 patients were stage 4, all of whom received chemotherapy, 3 of whom also received surgery and 2 also received radiation [6]. Suzuki and colleagues [7] reported a series of 44 patients. Eight patients had locoregional neuroblastoma (five stage 1, one stage 2, five stage 3). According to International Neuroblastoma Response Criteria [A41]: all (5/5) patients with stage 1 disease had complete response to induction therapy; the only patient (1/1) with stage 2 disease had partial response; 80% (4/5) of stage 3 patients had complete response and 20% (1/5) had progressive disease; 21% (7/33) of stage 4 patients had complete response, 21% (7/33) had partial response, 36% (12/33) had no response, and 21% (7/33) had progressive disease [7].

Polishchuk and colleagues [3] reported a cohort of 16 adult patients with recurrent or refractory neuroblastoma managed with <sup>131</sup>I-MIBG monotherapy. Five of these patients had ganglioneuroblastoma according to Shimada histologic classification [A42]. Treatment toxicities included thrombocytopenia in 69% (20/29; 4 patients grade 3, 16 patients grade 4) [A43]; neutropenia in 69% (20/29; 7 patients grade 3; 13 patients grade 4); need for granulocyte colony-stimulating factor support in 45% (13/29); need for autologous hematopoietic stem cell support in 25% (7/28); 13% (2/15) late-onset grade 2 thyroid abnormalities; 6% (1/16) had second

hematologic malignancies. Stiefel and colleagues [10] reported 14 adult neuroblastoma patients with somatic *ALK* mutations, 7 of whom were treated with FDA-approved *ALK* inhibitors. Adverse events included nausea/vomiting (86%, 6/7) and neurologic side effects (43%, 3/7; hallucinations [1/3], drowsiness [1/3], dizziness [1/3]). Median overall survival since *ALK* inhibitor treatment was 46.5 (range 17-74) months.

## **Discussion**

This scoping review provides a detailed overview of adult neuroblastoma cases published in the literature from 1927 to present. We provide several examples of the heterogeneous nature of neuroblastoma, such as an 86-year-old presenting with a mediastinal mass. Our total count of 679 cases provides the literature with an update, as previous literature reviews quoted numbers ranging up to 200 cases. In addition, we detail patient survival according to modern risk stratification guidelines, and introduce recently published outcomes for targeted therapies.

In pediatrics, a considerable proportion of neuroblastoma cases have been associated with mutations of the *ALK* or *PHOX2B* gene [44,45], with somatic acquisitions *ALK* in up to 15% of cases [46]. *MYCN* amplification is reported in approximately 20% of pediatric neuroblastoma patients [44], and has been used as a biomarker to risk stratify patients for poorer prognosis. In our review, we identified seven studies detailing *MYCN* amplification testing, which reported 0 to 14% [7,33] of patients in respective series to test positive for *MYCN* amplification. In fact, the majority of studies reported 0% of patients harboring such a mutation [3,7,29,31,36]. However, Suzuki and colleagues [7] identified that somatic mutations in *ALK* occurred in 42% of patients, and *ATRX* mutations or deletions occurred in 58%. Accordingly, adult neuroblastoma cases may be more associated with progressive accumulation of somatic mutations [7,47], whereas childhood neuroblastoma cases may be more related to genetic susceptibility [44].



Studies of neuroblastoma in pediatrics versus adults show conflicting conclusions [4,7]. Conter and colleagues report in a conference abstract from University of Texas MD Anderson Cancer Center (1994-2012) of 118 adult and 112 pediatric patients no significant difference in survival for L1- ( $p=0.4$ ), L2- ( $p=0.54$ ), and M-stage ( $p=0.73$ ) disease [4]. Esiashvilli and colleagues using SEER data reported a 5-year overall survival to be 84.6% in infants, 47.8% in children 1-9 years old, 46.2% in children 10-19 years old, and 36.3% in adults aged  $\geq 20$  years [8]. Navalke and colleagues also used SEER data (1975-2006) and showed a decreasing survival rate from patients aged 0-4 years to patients aged 15-19 years; there were too few patients in age groups 20-24 and 25-29 years to produce stable survival rates [9]. Accordingly, whether the true survival of adult neuroblastoma patients is inferior to pediatric patients or whether the overall differences are secondary to different disease stage distributions of each population is unknown; however, the consistent reduction in overall survival in the aforementioned studies suggests that adults generally fare worse.

The history of adult neuroblastoma has improved due to advancements of diagnostic and therapeutic techniques. Our literature search spanning nearly a century demonstrates the progression of initially relying solely on basic imaging techniques such as radiography [A4,A6] to routinely using magnetic resonance imaging and MIBG (iodine-123 labeled with metaiodobenzylguanidine) [34,A74]. The use of targeted therapies has also expanded, with studies reporting immunotherapy such as anti-GD2 [7], which was previously used exclusively in high risk children [48]. Future studies would contribute to the literature by providing outcomes of additional adult patients undergoing targeted therapies.

This scoping review has several strengths. First, our literature search was thorough given several methods of identifying articles: searching four databases, reviewing literature searches of

previous reviews, and reviewing the references list of all 142 included studies. This increases the confidence of readers that the included number of cases approaches the true number of published cases of adult neuroblastoma. This new count of 679 cases can be quoted in the future to provide clinicians a more accurate impression of the probabilities of encountering this rare entity.

Second, this review outlined the presentations, management strategies, and outcomes using cohort studies. Cohort studies generally provide a more balanced representation of the average adult neuroblastoma case. This contrasts with case reports, which have the aim of showcasing unusual presentations and outcomes. Using our scoping review, readers can appreciate both the general prognosis of adult neuroblastoma and how it varies according to risk stratification, as well as unusual cases we described in our table of case reports.

Nevertheless, this review is not without limitations. As thorough as literature searches may be, they are inherently imperfect, so some cases may have been missed. Second, we were unable to meta-analyze survival data to provide updated estimates. This was due to a lack of individual patient data, as well as suspected difficulty in ascertaining whether patient stages were similarly categorized. Third, there is a potential for overlapping cases if case reports were published both by themselves as well as included in neuroblastoma registries. We aimed to overcome this issue with case series and cohort studies by reviewing the data sources such as the SEER registry. Our total count included only the studies with the highest number of patients of registries to avoid patient duplication. Whereas we agree that some case reports may not be representative of the typical adult neuroblastoma patient, neuroblastoma is a disease regarded for its clinical heterogeneity, so awareness of such obscure cases broadens the differential of the clinician met with this enigmatic disease.

## **Conclusion**

This scoping review documents the variable presentations, management strategies, and outcomes of 679 adult patients with neuroblastoma. Adult neuroblastoma is a rare disease entity that may present at any age, and appears to show considerable rates of somatic mutations. Future studies evaluating targeted therapies in larger samples are needed.

**Acknowledgements:** none.

**Author contributions:** BHA, BA, AA, AK conceived study idea. AK designed the study protocol. BHA and AK were involved in data extraction and synthesis of results. All authors were involved in manuscript writeup and critical review of the manuscript.

## References

1. Pizzo PA, Poplack DG. Principles and practice of pediatric oncology. Lippincott Williams & Wilkins; 2015.
2. Tang CK, Hajdu SI. Neuroblastoma in adolescence and adulthood. *New York State Journal of Medicine*. 1975;75:1434-8.
3. Polishchuk AL, DuBois SG, Haas-Kogan D. Response, survival, and toxicity after iodine-131-metaiodobenzylguanidine therapy for neuroblastoma in preadolescents, adolescents, and adults. *Cancer*. 2011;117:4286-93.
4. Conter HJ, Gopalakrishnan V, Ravi V, Ater J, Patel S, Araujo DM. Are adult and pediatric neuroblastoma clinically different entities? *Journal of Clinical Oncology*;31(suppl):10049.
5. Rogowitz E, Babiker HM, Kanaan M, Millius RA, Ringenberg QS, Bishop M. Neuroblastoma of the elderly, an oncologist's nightmare: case presentation, literature review and SEER database analysis. *Experimental Hematology & Oncology*. 2014;3:1-7.
6. Sorrentino S, Gigliotti AR, Sementa AR, et al. Neuroblastoma in the adult: the Italian experience with 21 patients. *Journal of Pediatric Hematology/Oncology*. 2014;36:e499-505.
7. Suzuki M, Kushner BH, Kramer K, et al. Treatment and outcome of adult-onset neuroblastoma. *International journal of cancer*. 2018;143:1249-58.
8. Esiashvili N, Goodman M, Ward K, Marcus Jr RB, Johnstone PA. Neuroblastoma in adults: incidence and survival analysis based on SEER data. *Pediatric blood & cancer*. 2007;49:41-6.
9. Navalkele P, O'Dorisio MS, O'Dorisio TM, Zamba GK, Lynch CF. Incidence, survival, and prevalence of neuroendocrine tumors versus neuroblastoma in children and young adults: nine standard SEER registries, 1975–2006. *Pediatric blood & cancer*. 2011;56:50-7.
10. Stiefel J, Kushner BH, Basu EM, Roberts SS, Modak S. ALK inhibitors for treatment of adult-onset neuroblastoma. *Pediatric Blood and Cancer*. 2021;68(suppl5):S226
11. Fortner J, Nicastrì A, Murphy ML. Neuroblastoma: natural history and results of treating 133 cases. *Annals of Surgery*. 1968;167:132.
12. Mackay B, Luna MA, Butler JJ. Adult neuroblastoma. Electron microscopic observations in nine cases. *Cancer*. 1976;37:1334-51.
13. Dosik GM, Rodriguez V, Benjamin RS, Bodey GP. Neuroblastoma in the adult. Effective combination chemotherapy. *Cancer*. 1978;41:56-63.
14. Lopez R, Karakousis C, Rao U. Treatment of adult neuroblastoma. *Cancer*. 1980;45:840-4.
15. Feinstein RS, Gatewood OM, Fishman EK, Goldman SM, Siegelman SS. Computed tomography of adult neuroblastoma. *Journal of computer assisted tomography*. 1984;8:720-6.

16. Aleshire SL, Glick AD, Cruz VE, Bradley CA, Parl FF. Neuroblastoma in adults. Pathologic findings and clinical outcome. *Archives of pathology & laboratory medicine*. 1985;109:352-6.
17. Allan SG, Cornbleet MA, Carmichael J, Arnott SJ, Smyth JF. Adult neuroblastoma report of three cases and review of the literature. *Cancer*. 1986;57:2419-21.
18. Kaye JA, Warhol MJ, Kretschmar C, Landsberg L, Iii EF. Neuroblastoma in adults. Three case reports and a review of the literature. *Cancer*. 1986;58:1149-57.
19. Gohji K, Nakanishi T, Hara I, Hamami G, Kamidono S. Two cases of primary neuroblastoma of the kidney in adults. *The Journal of urology*. 1987;137:966-8.
20. Hoefnagel CA, Klumper A, Voute PA. Single photon emission tomography using meta-[131 I] iodobenzylguanidine in malignant pheochromocytoma and neuroblastoma. *Journal of Medical Imaging*. 1987;1:57-60.
21. Heyman S, Evans AE, D'Angio GJ. I-131 metaiodobenzylguanidine: diagnostic use in neuroblastoma patients in relapse. *Medical and pediatric oncology*. 1988;16:337-40.
22. Behr, A., Uiks, RRJ & Phillips JI. Neuroblastoma in adults-a report of 3 cases. *South African Medical Journal*. 1989;75:333-5.
23. Krikke AP, van der Jagt EJ. Adult neuroblastoma: a report of two cases. *Rofo: Fortschritte auf dem Gebiete der Rontgenstrahlen und der Nuklearmedizin*. 1989;150:138-41.
24. Prestidge BR, Donaldson SS. Treatment results among adults with childhood tumors: a 20-year experience. *International Journal of Radiation Oncology Biology Physics*. 1989;17:507-14.
25. Raina V, Kumar R, Sharma SK, Sarkar C, Bal CS. Neuroblastoma in thoracic region in adults: a report of five cases. *Annals of Saudi Medicine*. 1994;14:338-41.
26. Moody AM, Norman AR, Tait D. Paediatric tumours in the adult population: the experience of the Royal Marsden Hospital 1974–1990. *Medical and Pediatric Oncology*. 1996;26:153-9.
27. Argani P, Erlandson RA, Rosai J. Thymic neuroblastoma in adults: report of three cases with special emphasis on its association with the syndrome of inappropriate secretion of antidiuretic hormone. *American journal of clinical pathology*. 1997;108:537-43.
28. Cotterill SJ, Parker L, More L, Craft AW. Neuroblastoma: Changing incidence and survival in young people aged 0–24 years. A report from the North of England Young Persons' Malignant Disease Registry. *Medical and Pediatric Oncology*. 2001;36:231-4.
29. Kushner BH, Kramer K, LaQuaglia MP, Modak S, Cheung NK. Neuroblastoma in adolescents and adults: The Memorial Sloan-Kettering experience. *Medical and pediatric oncology*. 2003;41:508-15.
30. Tateishi U, Hasegawa T, Makimoto A, Moriyama N. Adult neuroblastoma: radiologic and clinicopathologic features. *Journal of computer assisted tomography*. 2003;27:321-6.
31. Podda MG, Luksch R, Polastri D, Gandola L, Piva L, Collini P, Cefalo G, Terenziani M, Ferrari A, Casanova M, Spreafico F. Neuroblastoma in patients over 12 years old: a 20-year experience at the Istituto Nazionale Tumori of Milan. *Tumori Journal*. 2010;96:684-9.
32. Sartelet H, Decaussin M, Latour M, et al. Neuroblastoma in adults: A case series. *Virchows Arch*. 2013;463:101-352
33. Berbegall AP, Villamón E, Tadeo I, et al. Neuroblastoma after childhood: prognostic relevance of segmental chromosome aberrations, ATRX protein status, and immune cell infiltration. *Neoplasia*. 2014;16:471-80.
34. Jrebi NY, Iqbal CW, Joliat GR, Sebo TJ, Farley DR. Review of our experience with neuroblastoma and ganglioneuroblastoma in adults. *World journal of surgery*. 2014;38:2871-4.
35. Mahkamova K, Harrison BJ. Functional Retroperitoneal Neuroblastoma and Ganglioneuroblastoma in Adults. *World Journal of Endocrine Surgery*. 2014;6:89-95.
36. Mazzocco K, Defferrari R, Sementa AR, et al. Genetic abnormalities in adolescents and young adults with neuroblastoma: a report from the Italian Neuroblastoma group. *Pediatric blood and cancer*. 2015;62:1725-32.
37. Duan K, Dickson BC, Marrano P, Thorner PS, Chung CT. Adult-onset neuroblastoma: Report of seven cases with molecular genetic characterization. *Genes, Chromosomes and Cancer*. 2020;59:240-8.

38. Jin QY, Du SB, Yuan XJ. Exploring the prognosis of neuroblastoma in adolescents and adults: a case series and literature review. *Neoplasma*. 2022.
39. Franks LM, Bollen A, Seeger RC, Stram DO, Matthay KK. Neuroblastoma in adults and adolescents: an indolent course with poor survival. *Cancer: Interdisciplinary International Journal of the American Cancer Society*. 1997;79:2028-35.
40. Hasegawa T, Hirose T, Ayala AG, et al. Adult neuroblastoma of the retroperitoneum and abdomen: clinicopathologic distinction from primitive neuroectodermal tumor. *The American journal of surgical pathology*. 2001;25:918-24.
41. Brodeur GM, Pritchard J, Berthold F, et al. Revisions of the international criteria for neuroblastoma diagnosis, staging, and response to treatment. *J Clin Oncol* 1993;11:1466–77.
42. Shimada H, Chatten J, Newton WA, et al. Histopathologic prognostic factors in neuroblastic tumors. *J Natl Cancer Inst*. 1984;73:405-416.
43. US Department of Health and Human Services. Common Terminology Criteria for Adverse Events (CTCAE). Version 3. Washington, DC: National Institute of Health, National Cancer Institute; 2006.
44. Maris JM. Recent advances in neuroblastoma. *New England Journal of Medicine*. 2010 Jun 10;362:2202-11.
45. Mossé YP, Laudenslager M, Longo L, Cole KA, Wood A, Attiyeh EF, Laquaglia MJ, Sennett R, Lynch JE, Perri P, Laureys G. Identification of ALK as a major familial neuroblastoma predisposition gene. *Nature*. 2008;455:930-5.
46. George RE, Sanda T, Hanna M, Fröhling S, Ii WL, Zhang J, Ahn Y, Zhou W, London WB, McGrady P, Xue L. Activating mutations in ALK provide a therapeutic target in neuroblastoma. *Nature*. 2008;455:975-8.
47. Kennedy SR, Loeb LA, Herr AJ. Somatic mutations in aging, cancer and neurodegeneration. *Mech Ageing Dev* 2012;133:118–26.
48. Ploessl C, Pan A, Maples KT, Lowe DK. Dinutuximab: an anti-GD2 monoclonal antibody for high-risk neuroblastoma. *Annals of Pharmacotherapy*. 2016;50:416-22.

## Figure legends

Figure 1: PRISMA flow diagram

## Table legends

Table 1: Characteristics of 6 included cohort studies

Table 2: Genetic characteristics of neuroblastoma tumors in included studies

Table 3: Characteristics of 28 included case series

Table A1: Sample search strategy using medline database

Table A2: Characteristics of 102 included case reports

## Identification of studies via databases

Identification

Records identified from:  
Embase + Medline (n=1768)  
CINAHL (n=184)  
Web of Science (n=1216)

Records removed *before screening*:  
Duplicate records removed (n=881)

Screening

Records screened (n=2287)

Records excluded (n=2156)

Reports sought for retrieval  
(n=131)

Reports not retrieved  
(n=0)

Reports assessed for eligibility  
(n = 131)

Reports obtained from  
reference review of  
included studies (n=40)

Reports excluded: (n=30)  
Wrong patient population (n=23)  
Duplicate study (n=7)

Included

Studies included in review  
(n=136)  
Reports of included studies  
(n=141)

**Table 1: Characteristics of 6 included cohort studies**

| Study               | Country and Data Source                                                                   | Patient cohort                                           | Primary Tumor Site                                                                                                          | Management                                                                                                                                                                                                                                              | Outcome                                                                                                                                                                                                                                                                                                                                        |
|---------------------|-------------------------------------------------------------------------------------------|----------------------------------------------------------|-----------------------------------------------------------------------------------------------------------------------------|---------------------------------------------------------------------------------------------------------------------------------------------------------------------------------------------------------------------------------------------------------|------------------------------------------------------------------------------------------------------------------------------------------------------------------------------------------------------------------------------------------------------------------------------------------------------------------------------------------------|
| Tang 1975 [2]       | United States: Memorial Hospital 1948-1972                                                | N=27.<br>16 males (59%).                                 | Mediastinum (7), retroperitoneum (5), pelvis (1), extremity (1), neck (1), multiple sites (12).                             | Surgical resection in 26 patients. Combined chemotherapy and radiation in 18. Radiation only in 7.                                                                                                                                                      | 67% 1-year survival. 28% 2-year survival. 12% lived over 5 years.                                                                                                                                                                                                                                                                              |
| Polishchuk 2011 [3] | United States: University California San Francisco (recurrent or refractory cases)        | N=16.<br>8 males (50%)                                   | Abdomen (10), thorax (3), thoracoabdominal (1), pelvic (1), unknown (1).                                                    | <sup>131</sup> I-MIBG monotherapy                                                                                                                                                                                                                       | Median survival 36 months, estimated 3-year survival 43.2%.                                                                                                                                                                                                                                                                                    |
| Conter 2013 [4]     | United States: MD Anderson Cancer Center 1994-2012                                        | N=118.<br>Mean age 47 (range 18-82) years.               | NA                                                                                                                          | Specific management not available.                                                                                                                                                                                                                      | Adults similar survival to pediatrics (L1 p=0.40, L2 p=0.54, M p=0.73). L1 disease actuarial survival 94% at 3 years, 90% at 5 years, 69% at 10 years. L2 disease estimated survival 83% at 3 years, 73% at 5 years, 41% at 10 years. M actuarial survival 68% at 1 year, 33% at 2 years, 13% at 5 years. INRG stage was prognostic (p<0.001). |
| Rogowitz 2014 [5]   | United States National Cancer Surveillance, Epidemiology, and End-Results registry (SEER) | N=216.<br>35 patients >60 years (19%).<br>107 male (50%) | Most common site CNS (71) in patients 18-60 years. Most common site soft tissue including heart (21) in patients >60 years. | Specific management not available.                                                                                                                                                                                                                      | In patients >60 years, 5 year disease-specific survival was 40%. In patients with mediastinal, tracheal, and other resp neuroblastomas, 5 year disease-specific survival was 44% for 9 adult patients.                                                                                                                                         |
| Sorrentino 2014 [6] | Italy: Istituto Giannina Gaslini                                                          | N=16.<br>Mean age 26 (range 18-37). 7 male (44%).        | Abdomen (5), adrenal (5), thorax (2), pelvis (4).<br><br>6 patients metastatic disease on diagnosis.                        | <b>Stage 1/2 (4):</b><br>All surgery, of which 1 also chemotherapy.<br><br><b>Stage 3 (6):</b><br>Various combinations of surgery (3), chemotherapy (4), radiation (2).<br><br><b>Stage 4 (6):</b><br>All chemotherapy, 3 also surgery and 2 radiation. | <b>Stage 1/2:</b><br>2 died at 25 and 48 months. 1 alive with disease at 107 months. 1 remission at 130 months.<br><br><b>Stage 3:</b><br>5 patients died of disease at mean 70 months; 1 patient remission at 142 months.<br><br><b>Stage 4:</b><br>6 patients died of disease at mean 46 months.                                             |

|                 |                                                                 |                                                    |                                                                                                 |                                                                                                                                                                                                                                                                                                                                                                                                                                                                                                                                                    |                                                                                                                                                                                                                                                                                                                                                                                  |
|-----------------|-----------------------------------------------------------------|----------------------------------------------------|-------------------------------------------------------------------------------------------------|----------------------------------------------------------------------------------------------------------------------------------------------------------------------------------------------------------------------------------------------------------------------------------------------------------------------------------------------------------------------------------------------------------------------------------------------------------------------------------------------------------------------------------------------------|----------------------------------------------------------------------------------------------------------------------------------------------------------------------------------------------------------------------------------------------------------------------------------------------------------------------------------------------------------------------------------|
| Suzuki 2018 [7] | United States: Memorial Sloan Kettering Cancer Center 1979-2015 | N=44. Median age 25 (range 18-71). 25 males (57%). | Adrenal gland (26), abdominal paraspinal region (11), mediastinum (5); bone or bone marrow (2). | <p><b>Locoregional neuroblastoma (11):</b><br/>All surgery, and 8 additionally received chemotherapy.</p> <p><b>Stage 4 (33):</b><br/>27 high-dose chemotherapy. 1 patient crizotinib for ALK-mutation. Surgery was attempted in 11 patients.</p> <p>Of 7 stage 4 patients with complete response, 5 received autologous stem cell transplant, 1 received autologous stem cell transplant and anti-GD2 immunotherapy with 3F8. 7 with incomplete response received anti-GD2 immunotherapy: 4 with m3F8 + GM-CSF, 2 with 3F8 alone, 1 with 3F8.</p> | <p><b>Locoregional neuroblastoma:</b><br/>10-year progression-free 35.4% and overall survival was 61.4%</p> <p><b>Stage 4:</b><br/>7 (21%) achieved complete response (CR) after induction chemotherapy and/or surgery. 5-year progression-free survival 9.7%. 10- year overall survival 19%. Patients who achieved complete response after induction had superior survival.</p> |
|-----------------|-----------------------------------------------------------------|----------------------------------------------------|-------------------------------------------------------------------------------------------------|----------------------------------------------------------------------------------------------------------------------------------------------------------------------------------------------------------------------------------------------------------------------------------------------------------------------------------------------------------------------------------------------------------------------------------------------------------------------------------------------------------------------------------------------------|----------------------------------------------------------------------------------------------------------------------------------------------------------------------------------------------------------------------------------------------------------------------------------------------------------------------------------------------------------------------------------|

\*Three studies not detailed given overlapping patients [8-10]



**Table 2: Genetic abnormalities of neuroblastoma tumors in cohort studies and case series**

| Study               | Genetic testing                                                                                                                                                                                                                                                                                  | Genetic outcomes                                                                                                                                                                                                                                                                                                                                                                                                                                                                                                                     |
|---------------------|--------------------------------------------------------------------------------------------------------------------------------------------------------------------------------------------------------------------------------------------------------------------------------------------------|--------------------------------------------------------------------------------------------------------------------------------------------------------------------------------------------------------------------------------------------------------------------------------------------------------------------------------------------------------------------------------------------------------------------------------------------------------------------------------------------------------------------------------------|
| Polishchuk 2011 [3] | NA.                                                                                                                                                                                                                                                                                              | 0/9 MYCN amplifications.                                                                                                                                                                                                                                                                                                                                                                                                                                                                                                             |
| Sorrentino 2014 [6] | NA.                                                                                                                                                                                                                                                                                              | 1/10 tested patients MYCN amplification.<br>1/5 tested patients 1p chromosome deletion.                                                                                                                                                                                                                                                                                                                                                                                                                                              |
| Suzuki 2018 [7]     | FISH; whole exome sequencing; DNA sequencing for <i>ALK</i> ; targeted exome sequencing using Foundation One or MSK-IMPACT                                                                                                                                                                       | 0/40 tumor <i>MYCN</i> amplification.<br>15/26 (58%) <i>ATRX</i> mutations or deletions.<br>10/16 (42%) <i>ALK</i> mutations.<br>Various somatic mutations in 11 patients with targeted exome sequencing including <i>BRCA1</i> , <i>IKZF2</i> , <i>NF2</i> , <i>MUTYH</i> , <i>TP53</i> , <i>CSF1R</i> , <i>CRLF2</i> , <i>FAT1</i> , <i>NUP93</i> , <i>BLM</i> , <i>PTPRD</i> , <i>RAC1</i> , <i>EZH2</i> , <i>SMARCA4</i> , <i>ERBB3</i> , <i>NOTCH3</i> , <i>PAK1</i> , <i>RBM10</i> , <i>BCL6</i> , <i>KIT</i> , <i>RASA1</i> . |
| Kushner 2003 [29]   | NA.                                                                                                                                                                                                                                                                                              | 0/22 tumor <i>MYCN</i> amplification.                                                                                                                                                                                                                                                                                                                                                                                                                                                                                                |
| Podda 2010 [31]     | NA.                                                                                                                                                                                                                                                                                              | 0/5 tumor <i>MYCN</i> amplification.                                                                                                                                                                                                                                                                                                                                                                                                                                                                                                 |
| Berbegall 2014 [33] | aSNP, MLPA, and FISH in tumors with adequate DNA quality; FISH used for MYCN                                                                                                                                                                                                                     | 1/7 tumor heterogenous <i>MYCN</i> amplification.<br>1/6 17q gain.<br>1/6 11q deletion.<br>2/4 focal segmental chromosome aberration (+5p; +20p).<br>2/4 copy-neutral loss of heterozygosity (4q, 11p, 11p; 12q, 19p; 6p).                                                                                                                                                                                                                                                                                                           |
| Mazzocco 2015 [36]  | Double color FISH on interphase nuclei using <i>MYCN/LAF</i> probe for chromosomes 2p24 and 2q11; <i>ALK</i> assessed in exons 20 to 28 of the <i>ALK</i> gene; <i>ATRX</i> assessed in five exons (10, 16, 19, 30, 32) and five portions of exon 9 and flanking splice junctions of <i>ATRX</i> | 0/3 tumor <i>MYCN</i> amplification.<br>0/3 <i>ALK</i> mutations.<br>1/3 <i>ATRX</i> mutations (c.6572A>C p.D2191A).<br>1 patient 1p deletion, 9p deletion.<br>1 patient 2p gain.<br>1 patient 1p deletion, 9p deletion, 11q deletion, 17q gain.                                                                                                                                                                                                                                                                                     |
| Sartelet 2013 [32]  | FISH for <i>MYCN</i> amplification.                                                                                                                                                                                                                                                              | 0/4 <i>MYCN</i> amplification.                                                                                                                                                                                                                                                                                                                                                                                                                                                                                                       |
| Mahkamova 2014 [35] | NA.                                                                                                                                                                                                                                                                                              | 0/1 <i>MYCN</i> amplification.                                                                                                                                                                                                                                                                                                                                                                                                                                                                                                       |
| Duan 2019 [37]      | FISH used for MYCN copy number, chromosome 1p loss and 17q gain;                                                                                                                                                                                                                                 | MYCN: 4/7 no amplification, 1/7 focal amplification, 1/7 diffuse amplification, 1/7 gain.                                                                                                                                                                                                                                                                                                                                                                                                                                            |

|  |                                                                                                                           |                                                                                                                                                                                                                                                                                              |
|--|---------------------------------------------------------------------------------------------------------------------------|----------------------------------------------------------------------------------------------------------------------------------------------------------------------------------------------------------------------------------------------------------------------------------------------|
|  | detecting alternate lengthening of telomeres ( <i>ALT</i> ); and for detecting telomerase gene <i>TERT</i> rearrangement. | 2/6 <i>ALK</i> mutation using IHC, of which no break detected using FISH.<br>4/5 <i>ATRX</i> mutation using IHC, of which 1 positive in 3.8% of cells using FISH.<br>1/5 1p deletion.<br>4/4 17q gain.<br>1/5 <i>TERT</i> rearrangement (diffuse amplification of 200x) detected using FISH. |
|--|---------------------------------------------------------------------------------------------------------------------------|----------------------------------------------------------------------------------------------------------------------------------------------------------------------------------------------------------------------------------------------------------------------------------------------|

NA: not available; M: male; F: female; mo: month. MSK-IMPACT: Memorial Sloan Kettering Integrated Mutation Profiling of Actionable Cancer Targets; FISH: fluorescence in situ hybridization; IHC: immunohistochemistry;

**Table 3: Characteristics of 28 included case series**

| Study                | Age                                         | Sex    | Location of Primary                                                                            |
|----------------------|---------------------------------------------|--------|------------------------------------------------------------------------------------------------|
| Fortner 1968 [11]    | 7 patients (2 male), locations not reported |        |                                                                                                |
| Mackay 1976 [12]     | 54                                          | Female | Right parotid gland                                                                            |
|                      | 72                                          | Male   | Left paravertebral area, buttocks, right inguinal area                                         |
|                      | 60                                          | Male   | Left subdigastric region, posterior cervical area                                              |
|                      | 35                                          | Male   | Extending throughout retroperitoneum, left ankle                                               |
|                      | 25                                          | Male   | Right liver lobe                                                                               |
|                      | 37                                          | Female | Retroperitoneum involving pancreas                                                             |
| Dosik 1978 [13]      | 37                                          | Female | Liver, retroperitoneum involving pancreas                                                      |
|                      | 20                                          | Male   | Posterior abdominal mass extending into pelvis                                                 |
|                      | 23                                          | Male   | Posterior abdominal mass extending into pelvis                                                 |
| Lopez 1979 [14]      | 33                                          | Female | Left adrenal extending to left upper quadrant of abdomen                                       |
|                      | 52                                          | Female | Mediastinum, metastatic to abdomen, retroperitoneum, brain                                     |
| Feinstein 1984 [15]  | 40                                          | Female | Posterior mediastinum                                                                          |
|                      | 20                                          | Male   | Pelvis with another mass right chest above diaphragm                                           |
|                      | 19                                          | Male   | Right adrenal involving retrocaval lymph nodes and encasing IVC                                |
|                      | 20                                          | Male   | Left hemithorax extending laterally to soft tissues, T3-T5 vertebral bodies, acetabulum, femur |
|                      | 28                                          | Male   | Left para-aortic region and left renal vein                                                    |
| Aleshire 1985 [16]   | 75                                          | Male   | Soft tissue of neck                                                                            |
|                      | 57                                          | Female | Parotid                                                                                        |
|                      | 32                                          | Male   | Iliac fossa                                                                                    |
|                      | 26                                          | Male   | Soft tissue of neck                                                                            |
|                      | 65                                          | Female | Soft tissue of neck                                                                            |
|                      | 29                                          | Female | Adrenal gland                                                                                  |
|                      | 53                                          | Male   | Retroperitoneum                                                                                |
|                      | 68                                          | Male   | Soft tissue of neck                                                                            |
| Allan 1986 [17]      | 26                                          | Female | Right pelvis, previous ovarian cystectomy                                                      |
|                      | 34                                          | Female | Right thorax infiltrating intervertebral foramina                                              |
|                      | 25                                          | Male   | Pelvis encasing IVC                                                                            |
| Kaye 1986 [18]       | 26                                          | Female | Right lower neck, anterior mediastinum, bones                                                  |
|                      | 38                                          | Female | Right adrenal mass metastatic to bone                                                          |
|                      | 20                                          | Female | Pelvis involving uterus, and omentum, mesentery, liver                                         |
| Gohji 1987 [19]      | 35                                          | Male   | Lower pole of right kidney                                                                     |
|                      | 29                                          | Male   | Right kidney infiltrating IVC wall and psoas muscle                                            |
| Hoefnagel 1987 [20]  | 18                                          | NA     | NA                                                                                             |
|                      | 22                                          | Male   | Abdomen, mediastinum                                                                           |
|                      | 32                                          | NA     | NA                                                                                             |
|                      | 52                                          | NA     | NA                                                                                             |
| Heyman 1988 [21]     | 22                                          | Male   | NA                                                                                             |
|                      | 30                                          | Male   | NA                                                                                             |
| Behr 1989 [22]       | 47                                          | Female | Below right scapula                                                                            |
|                      | 26                                          | Female | Retroperitoneum infiltrating bladder and right superior mediastinum                            |
| Krikke 1989 [23]     | 25                                          | Female | Left adrenal gland metastatic to abdominal viscera and bones                                   |
|                      | 23                                          | Female | Right paravertebral area T12-L2                                                                |
| Prestridge 1989 [24] | 18                                          | Male   | Hemi-abdomen, pelvis                                                                           |
|                      | 19                                          | Female | Hemi-abdomen                                                                                   |
|                      | 19                                          | Male   | Hemi-abdomen                                                                                   |
|                      | 25                                          | Female | Hemi-abdomen                                                                                   |
|                      | 34                                          | Female | Hemi-abdomen, pelvis                                                                           |
| Raina 1994 [25]      | 18                                          | Female | Left infra-axillary region involving 4 <sup>th</sup> rib                                       |
|                      | 21                                          | Male   | Anterosuperior mediastinum                                                                     |
|                      | 18                                          | Male   | Right upper lung lobe, mediastinum                                                             |
|                      | 35                                          | Female | Left paravertebral region extending into right paravertebral region, left hemithorax           |

|                     |                                                                                                              |                                                                                                              |                                                                         |
|---------------------|--------------------------------------------------------------------------------------------------------------|--------------------------------------------------------------------------------------------------------------|-------------------------------------------------------------------------|
| Moody 1996 [26]     | 33                                                                                                           | Male                                                                                                         | Retroperitoneum with multiple liver metastases                          |
|                     | 24                                                                                                           | Male                                                                                                         | Metastasis to bone, primary location unknown                            |
|                     | 24                                                                                                           | Female                                                                                                       | Adrenal gland metastasis to bone                                        |
| Argani 1997 [27]    | 80                                                                                                           | Male                                                                                                         | Thymus                                                                  |
|                     | 71                                                                                                           | Male                                                                                                         | Anterior mediastinum                                                    |
| Cotterill 2001 [28] | 3 patients, unknown genders and neuroblastoma locations.                                                     |                                                                                                              |                                                                         |
| Kushner 2003 [29]   | 18                                                                                                           | Male                                                                                                         | Right adrenal, cortical bone, liver, thoracic                           |
|                     | 23                                                                                                           | Female                                                                                                       | Left adrenal, bone marrow, cortical bone                                |
|                     | 23                                                                                                           | Male                                                                                                         | Bone marrow, cortical bone                                              |
|                     | 29                                                                                                           | Male                                                                                                         | Left adrenal, bone marrow, cortical bone, liver                         |
|                     | 31                                                                                                           | Female                                                                                                       | Left adrenal, thoracic, left supraclavicular                            |
|                     | 20                                                                                                           | Male                                                                                                         | Retroperitoneum                                                         |
|                     | 24                                                                                                           | Female                                                                                                       | Retroperitoneum, bone marrow, cortical bone, thoracic                   |
|                     | 19                                                                                                           | Female                                                                                                       | Retroperitoneum, bone marrow, cortical bone, thoracic                   |
|                     | 24                                                                                                           | Female                                                                                                       | Pelvis, bone marrow, cortical bone                                      |
|                     | 31                                                                                                           | Female                                                                                                       | Retroperitoneum, cortical bone, thoracic                                |
|                     | 32                                                                                                           | Male                                                                                                         | Retroperitoneum, bone marrow, cortical bone                             |
|                     | 33                                                                                                           | Male                                                                                                         | Left adrenal, bone marrow, cortical bone                                |
|                     | 41                                                                                                           | Male                                                                                                         | Retroperitoneum, pelvis, sphenoid                                       |
|                     | 18                                                                                                           | Female                                                                                                       | Thoracoabdominal                                                        |
|                     | 18                                                                                                           | Male                                                                                                         | Thoracoabdominal, left supraclavicular                                  |
|                     | 21                                                                                                           | Female                                                                                                       | Retroperitoneum, bone marrow, thoracic, supraclavicular                 |
|                     | 24                                                                                                           | Female                                                                                                       | Bone marrow, cortical bone                                              |
|                     | 27                                                                                                           | Female                                                                                                       | Thoracic, left supraclavicular                                          |
| Tateishi 2003 [30]  | 6 patients, mean age 49, tumor sites include retroperitoneum (n=2), pelvis (n=2), anterior mediastinum (n=1) |                                                                                                              |                                                                         |
| Podda 2010 [31]     | 69                                                                                                           | Male                                                                                                         | Adrenal gland, no metastasis                                            |
|                     | 18                                                                                                           | Female                                                                                                       | Thorax, no metastasis                                                   |
|                     | 30                                                                                                           | Male                                                                                                         | Thorax, no metastasis                                                   |
|                     | 36                                                                                                           | Male                                                                                                         | Thorax, no metastasis                                                   |
|                     | 32                                                                                                           | Male                                                                                                         | Adrenal gland, no metastasis                                            |
|                     | 19                                                                                                           | Male                                                                                                         | Thorax, metastasis to lymph node                                        |
|                     | 18                                                                                                           | Male                                                                                                         | Abdomen (not adrenal gland), metastasis to lymph node and bone marrow   |
|                     | 20                                                                                                           | Female                                                                                                       | Abdomen (not adrenal gland), metastasis to lymph node                   |
|                     | 21                                                                                                           | Female                                                                                                       | Abdomen (adrenal gland), metastasis to skeleton                         |
|                     | 25                                                                                                           | Female                                                                                                       | Abdomen (not adrenal gland), metastasis to bone marrow, skeleton, liver |
|                     | 19                                                                                                           | Male                                                                                                         | Abdomen (not adrenal gland), metastasis to lymph node                   |
|                     | 23                                                                                                           | Female                                                                                                       | Adrenal gland, metastasis to lymph node                                 |
|                     | Sartelet 2013 [32]                                                                                           | 4 patients (2 male); mean age 34 (range 22-53) years; 3 tumors in retroperitoneum, 1 tumor in adrenal gland. |                                                                         |
| Berbegall 2014 [33] | 18                                                                                                           | Male                                                                                                         | Pelvis                                                                  |
|                     | 19                                                                                                           | Female                                                                                                       | Adrenal gland                                                           |
|                     | 21                                                                                                           | Male                                                                                                         | Pelvis                                                                  |
|                     | 24                                                                                                           | Male                                                                                                         | Adrenal gland                                                           |
|                     | 36                                                                                                           | Female                                                                                                       | Adrenal gland                                                           |
|                     | 39                                                                                                           | Female                                                                                                       | Adrenal gland                                                           |
|                     | 60                                                                                                           | Female                                                                                                       | NA                                                                      |
| Jrebi 2014 [34]     | 25                                                                                                           | Female                                                                                                       | Pelvis                                                                  |
|                     | 19                                                                                                           | Female                                                                                                       | Mediastinum                                                             |
|                     | 22                                                                                                           | Male                                                                                                         | Mediastinum                                                             |
|                     | 31                                                                                                           | Male                                                                                                         | Retroperitoneum                                                         |
|                     | 50                                                                                                           | Female                                                                                                       | Groin, pelvis                                                           |
|                     | 28                                                                                                           | Female                                                                                                       | Pelvis                                                                  |
|                     | 20                                                                                                           | Male                                                                                                         | Abdomen                                                                 |
| 66                  | Female                                                                                                       | Abdomen, chest                                                                                               |                                                                         |

|                     |                                                                                                                    |        |                                                                                  |
|---------------------|--------------------------------------------------------------------------------------------------------------------|--------|----------------------------------------------------------------------------------|
|                     | 51                                                                                                                 | Female | Adrenal gland                                                                    |
|                     | 21                                                                                                                 | Female | Pelvis                                                                           |
| Mahkamova 2014 [35] | 36                                                                                                                 | Male   | Retroperitoneum: encasing aorta and IVC, infiltrating posterior abdominal wall   |
|                     | 21                                                                                                                 | Male   | Retroperitoneum: extending from upper pole of right kidney to aortic bifurcation |
| Mazzocco 2015 [36]  | 22                                                                                                                 | Male   | NA                                                                               |
|                     | 18                                                                                                                 | Male   | NA                                                                               |
|                     | 19                                                                                                                 | Male   | NA                                                                               |
| Duan 2019 [37]      | 9 patients (3 males); median age 24 (range 18-30) years; tumor locations include retroperitoneum (n=8), neck (n=1) |        |                                                                                  |
| Jin 2022 [38]       | 20                                                                                                                 | Female | Retroperitoneum, metastasis to bone and bone marrow                              |
|                     | 25                                                                                                                 | Female | Adrenal gland                                                                    |

\*Two studies not detailed given overlapping patients [39, 40]

**Appendix: Neuroblastoma in Adults: A Systematic Review of Presentations, Genetics and Therapies**

**Table A1: Sample search strategy using medline database**

|                                                                                                                                                                                   |                                                                                                                                                                                                                   |
|-----------------------------------------------------------------------------------------------------------------------------------------------------------------------------------|-------------------------------------------------------------------------------------------------------------------------------------------------------------------------------------------------------------------|
| Database: Embase <1974 to 2022 October 04>, OVID Medline Epub Ahead of Print, In-Process & Other Non-Indexed Citations, Ovid MEDLINE(R) Daily and Ovid MEDLINE(R) 1946 to Present |                                                                                                                                                                                                                   |
| Search Strategy:                                                                                                                                                                  |                                                                                                                                                                                                                   |
| -----                                                                                                                                                                             |                                                                                                                                                                                                                   |
| 1                                                                                                                                                                                 | neuroblastoma.ti,ab. (86935)                                                                                                                                                                                      |
| 2                                                                                                                                                                                 | adult*.ti,ab. (3411525)                                                                                                                                                                                           |
| 3                                                                                                                                                                                 | geriatrics/ (63893)                                                                                                                                                                                               |
| 4                                                                                                                                                                                 | geriatric*.ti,ab. (142867)                                                                                                                                                                                        |
| 5                                                                                                                                                                                 | octogenarian.ti,ab. (3901)                                                                                                                                                                                        |
| 6                                                                                                                                                                                 | nonagenarian.ti,ab. (1547)                                                                                                                                                                                        |
| 7                                                                                                                                                                                 | 2 or 3 or 4 or 5 or 6 (3565808)                                                                                                                                                                                   |
| 8                                                                                                                                                                                 | 1 and 7 (4349)                                                                                                                                                                                                    |
| 9                                                                                                                                                                                 | limit 8 to english language (4111)                                                                                                                                                                                |
| 10                                                                                                                                                                                | limit 9 to humans (3221)                                                                                                                                                                                          |
| 11                                                                                                                                                                                | limit 10 to "all adult (19 plus years)" [Limit not valid in Embase; records were retained] (2531)                                                                                                                 |
| 12                                                                                                                                                                                | limit 11 to animal studies [Limit not valid in Ovid MEDLINE(R),Ovid MEDLINE(R) Daily Update,Ovid MEDLINE(R) PubMed not MEDLINE,Ovid MEDLINE(R) In-Process,Ovid MEDLINE(R) Publisher; records were retained] (763) |
| 13                                                                                                                                                                                | 11 not 12 (1768)                                                                                                                                                                                                  |
| *****                                                                                                                                                                             |                                                                                                                                                                                                                   |

**Table A2: Characteristics of 102 included case reports**

| <b>Study</b>              | <b>Age</b> | <b>Sex</b> | <b>Location of Neuroblastoma</b>                                                  |
|---------------------------|------------|------------|-----------------------------------------------------------------------------------|
| Capaldi 1927 [A1]         | 44         | Female     | Sympathetic chain left C7-T1                                                      |
| Frost 1936 [A2]           | 38         | Male       | Right lung apex                                                                   |
| Balas 1959 [A3]           | 31         | Female     | Lung parenchyma                                                                   |
| Buthker 1964 [A4]         | 67         | Female     | Anterior mediastinum                                                              |
| Eklof 1967 [A5]           | 27         | Male       | Chest                                                                             |
| Griff 1968 [A6]           | 21         | Male       | Posterior mediastinum                                                             |
| Hutchinson 1968 [A7]      | 51         | Male       | Anterior mediastinum                                                              |
| Hale 1970 [A8]            | 26         | Female     | Right adrenal gland                                                               |
| Baumgartner 1975 [A9]     | 56         | Female     | Left kidney                                                                       |
| Chadhury 1975 [A10]       | 29         | Female     | Retroperitoneum                                                                   |
| Attal 1975 [A11]          | 25         | Male       | Left suprarenal region                                                            |
| Rowe 1979 [A12]           | 29         | Female     | Right adrenal gland                                                               |
| Reynolds 1981 [A13]       | 20         | Female     | Retrouterine pouch                                                                |
| Berkel 1982 [A14]         | 36         | Female     | Left adrenal gland metastatic to spine                                            |
| Blijham 1982 [A15]        | 19         | Male       | Right sub-hepatic space extending to iliac crests                                 |
| Raje 1982 [A16]           | 20         | Male       | Pelvis with extension to abdominal viscera, parietal peritoneum, and diaphragm    |
| Holgerson 1983 [A17]      | 29         | NA         | Thoracic region metastatic to lumbosacral spine                                   |
| Block 1984 [A18]          | 22         | Female     | Right ovary metastatic to retroperitoneum, mediastinum, and supraclavicular nodes |
| Grubb 1984 [A19]          | 58         | Female     | Right submandibular salivary gland                                                |
| Yashiro 1984 [A20]        | 26         | Female     | Left adrenal gland                                                                |
| Mackay 1987 [A21]         | 23         | Male       | Right scapula, possibly femur                                                     |
| Mir 1987 [A22]            | 29         | Male       | Left paraspinal region                                                            |
| Hoover 1988 [A23]         | 57         | Male       | Posterior mediastinum                                                             |
| Onishi 1988 [A24]         | 34         | Female     | Right adrenal gland with tumor thrombus extending into right renal vein, IVC, RA  |
| Roberts 1988 [A25]        | 22         | Male       | Left ilium, suprasellar region, right anterior clinoid process                    |
| Bullock 1989 [A26]        | 35         | Male       | Left orbit                                                                        |
| Cheah 1989 [A27]          | 24         | Male       | Left retroperitoneum involving suprarenal region and left liver lobe              |
| Urios 1989 [A28]          | 30         | Male       | Right paraspinal region at T6-7 level                                             |
| McDonnell 1990 [A29]      | 31         | Male       | Entire peritoneal cavity                                                          |
| Rossitti 1991 [A30]       | 39         | Male       | Left side of lumbosacral plexus                                                   |
| Chaloupka 1992 [A31]      | 31         | Male       | Anterior and posterior vertebral elements of T10 with encasement of spinal cord   |
| Salter 1995 [A32]         | 80         | Female     | Anterior mediastinum                                                              |
| Varona 1996 [A33]         | 18         | Female     | Right paravertebral region                                                        |
| Cowan 1997 [A34]          | 28         | Male       | Left kidney, left pelvis, left upper quadrant of abdomen                          |
| Wester 1997 [A35]         | 35         | Female     | Thoracolumbar region, metastasis to suprasellar and pontine cisterns              |
| Hirokawa 1998 [A36]       | 56         | Female     | Retroperitoneum extending into pelvic cavity                                      |
| Custodio 1999 [A37]       | 32         | Female     | Right adrenal gland region                                                        |
| Yamamoto 2000 [A38]       | 21         | Male       | Right thoracic paravertebral region                                               |
| Kawakami 2001 [A39]       | 43         | Female     | Retroperitoneum                                                                   |
| Genc 2003 [A40]           | 30         | Female     | Left adrenal gland                                                                |
| Shimizu 2003 [A41]        | 33         | Male       | Posterior mediastinum, 8-9 ribs, sympathetic chain                                |
| McLean 2004 [A42]         | 39         | Male       | Right adrenal gland                                                               |
| Sucker 2004 [A43]         | 21         | NA         | Left upper lung, left neck                                                        |
| Genc 2005 [A44]           | 52         | Male       | Left adrenal gland                                                                |
| Schalk 2005 [A45]         | 51         | Male       | Right adrenal gland                                                               |
| Ayadi-Kaddour 2007 [A46]  | 61         | Female     | Left posterior mediastinum                                                        |
| Loeser 2007 [A47]         | 39         | Female     | Cervix, with several recurrences afterwards                                       |
| Hadi 2008 [A48]           | 25         | Female     | Left adrenal gland, infiltrating kidney and pancreas                              |
| Refaat 2008 [A49]         | 25         | Female     | Right adrenal gland                                                               |
| Jarius 2009 [A50]         | 23         | Female     | Para-aortic region adjacent to left adrenal gland                                 |
| Ogawa 2009 [A51]          | 60         | Male       | Anterior mediastinum                                                              |
| Zerrweck-Lopez 2009 [A52] | 31         | Male       | Bilateral retroperitoneal mass displacing aorta and kindeys                       |

|                                 |    |        |                                                                                      |
|---------------------------------|----|--------|--------------------------------------------------------------------------------------|
| Jost 2010 [A53]                 | 67 | Female | Left adrenal gland, metastasis to paravertebral soft tissues, humerus, femur, pelvis |
| Panovska-Stavridis 2010 [A54]   | 38 | Male   | Thoracic para-spinal region                                                          |
| Singh 2010 [A55]                | 38 | Female | Bilateral adnexa, lymph nodes                                                        |
| Soares 2010 [A56]               | 23 | Female | T3-T5 paravertebral region extending into spinal canal, right parietal lobe          |
| Then 2010 [A57]                 | 55 | Male   | Possibly mediastinum; vertebral bodies T6-T10                                        |
| Venat-Bouvet 2010 [A58]         | 25 | Male   | Retroperitoneum                                                                      |
| Kajbafzadeh 2011 [A59]          | 52 | Male   | Rectovesical pouch                                                                   |
| Ohtaki 2011 [A60]               | 64 | Male   | Superior aspect of mediastinum                                                       |
| Marin Oyaga 2011 [A61]          | 29 | Male   | Adrenal gland                                                                        |
| Selcukbiricik 2011 [A62]        | 53 | Male   | Right neural foramina extending to spinal duct at T4-6 levels                        |
| Shi 2011 [A63]                  | 42 | Female | Anterior mediastinum                                                                 |
| Abdou 2012 [A64]                | 22 | Female | Pancreatic head                                                                      |
| Bayrak 2012 [A65]               | 37 | Female | Lower pole of right kidney                                                           |
| Pellegrino 2012 [A66]           | 79 | Female | Anterior mediastinum                                                                 |
| Shobha 2012 [A67]               | 26 | Female | Right ovary                                                                          |
| Ueda 2012 [A68]                 | 65 | Female | Anterior mediastinum                                                                 |
| Gupta 2013 [A69]                | 47 | Male   | Right adrenal region with infiltration into upper pole of right kidney               |
| Koumarianou 2013 [A70]          | 30 | Male   | Right adrenal gland                                                                  |
| Smith 2013 [A71]                | 39 | Female | Paraspinal, with metastasis to axial and appendicular skeleton, liver, lymph nodes.  |
| Tiu 2013 [A72]                  | 79 | Female | Lower pole of left kidney.                                                           |
| Imvrios 2014 [A73]              | 26 | Female | Right lumbar region                                                                  |
| Skoura 2014 [A74]               | 33 | Male   | Right adrenal gland                                                                  |
| Stevens 2014 [A75]              | 29 | Female | Right pelvis with lytic lesion of left iliac crest                                   |
| Thomas 2014 [A76]               | 79 | Female | Adrenal glands bilaterally                                                           |
| Rogowitz 2014 [A77]             | 86 | Male   | Mediastinum                                                                          |
| Febrero 2015 [A78]              | 39 | Male   | Left infrarenal space                                                                |
| Liu 2015 [A79]                  | 22 | Female | Upper pole of left kidney                                                            |
| Wiesel 2015 [A80]               | 62 | Male   | Anterior mediastinum                                                                 |
| Daboussi 2016 [A81]             | 21 | Male   | Posterior mediastinum                                                                |
| Kaluzna-Oleksy 2016 [A82]       | 21 | Female | Lumbar spine                                                                         |
| Kurokawa 2016 [A83]             | 62 | Male   | Left adrenal gland region                                                            |
| Rais 2016 [A84]                 | 40 | Male   | Right adrenal gland                                                                  |
| He 2016 [A85]                   | 28 | Female | Cervix                                                                               |
| Jain 2017 [A86]                 | 53 | Female | Right renal fossa                                                                    |
| Malik 2017 [A87]                | 23 | Male   | Left lumbar region                                                                   |
| Huang 2018 [A88]                | 41 | Female | Right kidney with retrocaval lymphadenopathy and right renal vein thrombus           |
| Ma 2018 [A89]                   | 24 | Male   | Posterior mediastinum                                                                |
| Manoharan 2018 [A90]            | 32 | Female | Left adrenal gland                                                                   |
| Wu 2018 [A91]                   | 20 | Female | Left retroperitoneal space                                                           |
| Martinez-Ciarpaglini 2019 [A92] | 40 | Male   | Left inguinal region                                                                 |
| Naeem 2019 [A93]                | 29 | Male   | Sacrum S1-S4, with mass surrounding sacral vertebrae extending into central canal    |
| Ramsignh 2019 [A94]             | 22 | Female | Left adrenal gland                                                                   |
| Tan 2019 [A95]                  | 46 | Female | Left dorsal pleura                                                                   |
| Yanik 2019 [A96]                | 40 | Male   | Anterior mediastinum                                                                 |
| Zhang 2019 [A97]                | 75 | Female | Left adrenal gland                                                                   |
| Bukhari 2020 [A98]              | 31 | Female | T12 vertebra                                                                         |
| Findakly 2020 [A99]             | 63 | Male   | NA                                                                                   |
| Nawata 2021 [A100]              | 63 | Male   | Left kidney with enlargement of intra-abdominal lymph nodes                          |
| Xu 2021 [A101]                  | 40 | Female | Left adrenal gland                                                                   |
| Gomez 2022 [A102]               | 24 | Female | Adrenal gland, retroperitoneum                                                       |

**References of included case reports:**

- A1. Capaldi, B. Zwei Falle von Sympathicoblastom. Frankfurt Z. Path 1927;35:83-100.  
A2. Frost TF, Wolpaw SE. Intra-thoracic Sympathoblastoma. Am. J. Cancer 1936;26:483.



- A3. Balas A. Neurogerier Lungentumor (Sympathoblasom). *Der Chirurg* 1959;30:325.
- A4. Büthker W, Feltkamp-Vroom T, Groen AS, Wieberdink J. Sympathicoblastoma in the anterior mediastinum. *Diseases of the Chest*. 1964;46:531-6.
- A5. Eklof OL, Gooding CA. Intrathoracic neuroblastoma. *American Journal of Roentgenology*. 1967;100:202-7.
- A6. Griff LC, Griff RE. Neuroblastoma emphasis on the mediastinal neuroblastoma. *American Journal of Roentgenology*. 1968;103:19-24.
- A7. Hutchinson III JE, Nash AD, McCord CW. Neuroblastoma of the anterior mediastinum in an adult. *The Journal of Thoracic and Cardiovascular Surgery*. 1968;56:147-52.
- A8. Hale JE. A case of neuroblastoma in an adult with raised catecholamines. *Journal of British Surgery*. 1970;57:551-3.
- A9. Baumgartner GC, Gaeta J, Wajzman Z, Merrin C. Neuroblastoma presenting as renal cell carcinoma in an adult. *Urology*. 1975;6:376-8.
- A10. Chadhury A. Abdominal sympathoblastoma in an adult with lung abscess. *J Indian Med Assoc* 1975;64:240-242.
- A11. Attal HC, Grover S, De'Souza E. Neuroblastoma presenting as disseminated osseous metastasis (a case report). *The Journal of the Association of Physicians of India*. 1975;23:531-4.
- A12. Rowe PH, Oram JJ, Scott GW. Neuroblastoma in adults. *Postgraduate Medical Journal*. 1979;55:579-80.
- A13. Reynolds CP, Smith RG, Frenkel EP. The  
Cancer. 1981;48:2088-94.
- A14. Berkel MV, Rijn HJ, Lammers HA. Adrenal neuroblastoma sympathicum in a 36-year-old woman. *European Journal of Nuclear Medicine*. 1982;7:278-9.
- A15. Blijham GH, Barlogie B, Richman S, Latreille J, Vellekoop L. Medulloblastoma and neuroblastoma in adults. *Netherlands Journal of Medicine*. 1982;25(4):94-9.
- A16. Raje D, Shah DJ, Lofters WS. Neuroblastoma in an adult. *West Indian medical journal*. 1982;149-52.
- A17. Holgersen LO, Santulli TV, Schullinger JN, Berdon WE. Neuroblastoma with intraspinal (dumbbell) extension. *Journal of Pediatric Surgery*. 1983;18:406-11.
- A18.  
term survival. Case report and review of the literature. *Cancer*. 1984;54:590-5.
- A19. Grubb BP, Thant M. Neuroblastoma in an adult. *Southern Medical Journal*. 1984;77:1180-2.
- A20. Yashiro N, Yoshida H, Kuwajima S, Nomura T, Akima M. Adult adrenal neuroblastoma with extension into inferior vena cava. *Radiation Medicine*. 1984;2:234-6.
- A21. Mackay B, Ordóñez NG. Adult neuroblastoma of bone: A case report. *Ultrastructural Pathology*. 1987;11:455-64.
- A22. Mir R, Phillips SL, Schwartz G, Mathur R, Khan A, Kahn LB. Metastatic neuroblastoma after 52 years of dormancy. *Cancer*. 1987;60:2510-4.
- A23. Hoover EL, Hsu HK, Dressler C, Fani K, Webb H, Ketosugbo A, Kharma B. Neuroblastoma: a rare primary intrathoracic neurogenic tumor in adults. *Texas Heart Institute Journal*. 1988;15:107.
- A24. Onishi S, Shibahara N, Yasuta H, et al. Adult neuroblastoma of the adrenal with intraatrial tumor thrombus: report of a case. *Hinyokika kyo. Acta Urologica Japonica*. 1988;34:1195-9.
- A25. Roberts JL, Magid D, Miller NR, Kuhajda FP, Fishman EK. Case report 493. *Skeletal Radiol*. 1988;17:375-377.
- A26. Bullock JD, Goldberg SH, Rakes SM, Felder DS, Connelly PJ. Primary orbital neuroblastoma. *Archives of Ophthalmology*. 1989;107:1031-3.
- A27. Cheah PL, Jayalakshmi P, Jeyamalar R, Kuperan P. Adult neuroblastoma: a case report. *The Malaysian Journal of Pathology*. 1989;11:69-71.
- A28. Urios JI, Garceran LR, Rosell TV. Neuroblastoma in an adult causing spinal cord compression: report of a case and review of the literature. *Spinal Cord*. 1989;27:394-401.

- A29. McDonnell III CH, McLeod M, Baker ME. Primary peritoneal neuroblastoma: computed tomography findings. *Clinical imaging*. 1990;14(1):41-3.
- A30. Rossitti SL, Matos PS, Balbo RJ, Zuiani AR, Thomaz IR. Adult peripheral neuroblastoma. *Arquivos de Neuro-Psiquiatria*. 1991;49:357-61.
- A31. Chaloupka JC, Castillo M. Primary neuroblastoma of a vertebra: an unusual location for a variant of primitive neuroectodermal tumor of bone. *AJR. American journal of roentgenology*. 1992;159:1130.
- A32. Salter JE, Gibson D, Ordóñez NG, Mackay B. Neuroblastoma of the anterior mediastinum in an 80-year-old woman. *Ultrastructural Pathology*. 1995;19:305-10.
- A33. Varona L, Ruiz J. Adult-onset neuroblastoma with intraspinal (dumbbell) extension. *Neurologia (Barcelona, Spain)*. 1996;11:88-9.
- A34. Cowan JM, Dayal Y, Schwaitzberg S, Tischler AS. Cytogenetic and immunohistochemical analysis of an adult anaplastic neuroblastoma. *The American journal of surgical pathology*. 1997;21:957-63.
- A35. Wester S, Mork S, Smievoll AI. Neuroblastoma and venous sinus thrombosis in an adult patient. *British journal of neurosurgery*. 1997;11:241-4.
- A36. Hirokawa S, Yamashita I, Kuroki Y, et al. Neuroblastoma in an adult with a high serum level of carbohydrate antigen, CA125: report of a case. *Surgery today*. 1998;28:349-54.
- A37. Custodio CM, Semelka RC, Balci NC, Mitchell KM, Freeman JA. Adrenal neuroblastoma in an adult with tumor thrombus in the inferior vena cava. *Journal of Magnetic Resonance Imaging*. 1999;9:621-3.
- A38. Yamamoto R, Tada H, Kishi A, Tojo T, Asada H, Inoue T. Neuroblastoma resection in an adult with a 10-year history of chest-mass shadow. *The Japanese Journal of Thoracic and Cardiovascular Surgery*. 2000;48:809-11.
- A39. Kawakami M, Koda M, Matsunaga N, et al. Adult-type neuroblastoma originated in retroperitoneum beginning with obstructive jaundice. *Clinical imaging*. 2001;25:284-7.
- A40. Genc FA, Aksoy M, Kapran Y, et al. Adrenal neuroblastoma in an adult: Report of a case. *Surgery today*. 2003;33:879-81.
- A41. Shimizu M, Shimizu T, Adachi T, Nishiuchi M, Kanzaki M, Onuki T. Long-term survival in adult mediastinal neuroblastoma. *The Japanese Journal of Thoracic and Cardiovascular Surgery*. 2003;51:326-9.
- A42. McLean TW, Iskandar SS, Shimada H, Hall MC. Neuroblastoma in an adult. *Urology*. 2004;64:1232.
- A43. Sucker C, Dölken G, Lorenz G, Fiedler W, Stockschräder M. Thoracic neuroblastoma in a young adult. *Deutsche Medizinische Wochenschrift (1946)*. 2004;129:249-52.
- A44. Genc H, Hacıyanlı M, Hacıyanlı SG, Gelal F, Uçarsoy AA, Dag F. An adult adrenal neuroblastoma: a case report. *Acta Chirurgica Belgica*. 2005;105:673-6.
- A45. Schalk E, Mohren M, Koenigsmann M, Buhtz P, Franke A, Jentsch-Ullrich K. Metastatic adrenal neuroblastoma in an adult. *Oncology Research and Treatment*. 2005;28:353-5.
- A46. Ayadi-Kaddour A, Chaabouni S, Mlika M, Kilani T, Hassine RB, El Mezni F. Neuroblastoma of the posterior mediastinum in a 61-year-old woman. *Respiratory Medicine Extra*. 2007;3(3):114-6.
- A47. Loeser A, Gerharz EW, Riedmiller H. Recurrent pelvic neuroblastoma in an adult patient. *Gynecologic oncology*. 2007;106:257-8.
- A48. Hadi AM, Khalaf IJ, Abbass YI. An adult adrenal neuroblastoma presented as a right shoulder pain: A case report. *The Medical Journal of Tikrit University*. 2008;2(142).
- A49. Refaat MM, Idriss SZ, Blaszkowsky LS. Case report: an unusual case of adrenal neuroblastoma in pregnancy. *The Oncologist*. 2008;13:152-6.
- A50. Jarius S, Arnold S, Linke R, et al. Long term survival in anti-Hu associated adult neuroblastoma. *Journal of the neurological sciences*. 2009;284:205-8.

- A51. Ogawa F, Amano H, Iyoda A, Satoh Y. Thymic neuroblastoma with the syndrome of inappropriate secretion of antidiuretic hormone. *Interactive Cardiovascular and Thoracic Surgery*. 2009;9:903-5.
- A52. Zerrweck-López C, Quijano-Orvañanos F, Montañez-Ramírez H, et al. Neuroblastoma in the adult. Case report. *Cirugia y Cirujanos*. 2009;77:397-401.
- A53. Jost G, Frank S, Fischer N, Taub E, Mariani L. An epidural neuroblastoma causing spinal cord compression in a 67-year-old woman. *Rare tumors*. 2010;2(2):74-7.
- A54. Panovska-Stavridis I, Ivanovski M, Hadzi-Pecova L, et al. A case report of aggressive adult neuroblastoma mimicking acute leukemia with fulminant course and fatal outcome. *Prilozi*. 2010;31:349-59.
- A55. Singh M, Arora P, Singh S, et al. Adult neuroblastoma of the ovary: a rare tumor with review of literature. *Journal of Cancer Research and Therapeutics*. 2010;6:367.
- A56. Soares PM, Quirino Filho S, Pereira DE, Bonan PF, Martelli-Júnior H. Neuroblastoma in an adult: Case report. *Rev Med Chile*. 2010;138:1131-4.
- A57. Then C, Ebelt K, Langer A, Mayr D, Schmidmaier R, Oduncu F. Neuroblastoma in a 55-year-old patient: a case report. *Case Reports in Oncology*. 2010;3:458-62.
- A58. Venat-Bouvet L, Le Brun-Ly V, Martin J, Gasnier O, Falkowsky S, Tubiana-Mathieu N. Long-term survival in adult neuroblastoma with multiple recurrences. *Case Reports in Oncology*. 2010;3:45-8.
- A59. Kajbafzadeh AM, Sadeghi Z, Esfahani SA, Fisher C, Judson I. Adult pelvic neuroblastoma: long-term survival and review of the literature/Eriskinlerde pelvis nöroblastom: Uzun dönem sagkalim ve literatürün gözden geçirilmesi. *Turkish Journal of Urology*. 2011;37:167.
- A60. Ohtaki Y, Ishii G, Hasegawa T, Nagai K. Adult neuroblastoma arising in the superior mediastinum. *Interactive Cardiovascular and Thoracic Surgery*. 2011;13:220-2.
- A61. Marín Oyaga VA, Cuenca Cuenca JI, Fernández López R, Borrego Dorado I, Vázquez Albertino R. 123I-  
journal of nuclear medicine and molecular imaging. 2011;38:1586.
- A62. Selcukbiricik F, Tural D, Esatoglu N, Kocak S, Mandel NM. A very rare adult case with neuroblastoma. *Case Reports in Oncology*. 2011;4:481-6.
- A63. Shi Jr X, Wang X, Yi C, Zhang X, Chen Z. Imaging features of adult neuroblastoma in F-18 FDG PET/CT. *Clinical Nuclear Medicine*. 2011;36:1058-60.
- A64. Abdou AG, Asaad NY, Elkased A, Said H, Dawoud M. Adult pancreatic neuroblastoma, an unusual site and fatal outcome. *Pathology & Oncology Research*. 2012;18:239-43.
- A65. Bayrak O, Seckiner I, Erturhan S, Aydin A, Yagci F. Adult intrarenal neuroblastoma presenting as renal cell carcinoma. *Canadian Urological Association Journal*. 2012;6:E144.
- A66. Pellegrino M, Gianotti L, Cassibba S, Brizio R, Terzi A, Borretta G. Neuroblastoma in the elderly and SIADH: case report and review of the literature. *Case reports in medicine*. 2012;2012.
- A67. Shobha K, Bafna UD, Devi UK, Amirtham U. Primary neuroblastoma of ovary in an adult: A case report and review of literature. *Clinical Cancer Investigation Journal*. 2012 Apr 1;1(2):92.
- A68. Ueda Y, Omasa M, Taki T, et al. Thymic neuroblastoma within a thymic cyst in an adult. *Case reports in oncology*. 2012;5:459-63.
- A69. Gupta P, Maiti A, Aich RK, Deb AR. Adrenal neuroblastoma in an adult. *Journal of Cancer Research and Therapeutics*. 2013;9:96.
- A70. Koumariou A, Oikonomopoulou P, Baka M, et al. Implications of the incidental finding of a MYCN amplified adrenal tumor: a case report and update of a pediatric disease diagnosed in adults. *Case Reports in Oncological Medicine*. 2013;2013.
- A71. Smith L, Minter S, O'Brien P, Kravetka JM, Medina AM, Lazarchick J. Neuroblastoma in an adult: case presentation and literature review. *Annals of Clinical & Laboratory Science*. 2013;43:81-4.
- A72. Tiu A, Latif E, Yau L, Reynolds R, Millar EK, Aslan P. Primary renal neuroblastoma in adults. *Urology*. 2013;82:11-3.

- A73. Imvrios G, Filis D, Fouzas I, et al. A Rare Adult Case with Neuroblastoma. *Journal of Tumor*. 2015;2:278-81.
- A74. Skoura E, Oikonomopoulos G, Vasileiou S, Kyprianou D, Koumakis G, Datseris IE. (18) F-FDG-PET/CT,(123) I-MIBG and (99m) Tc-MDP whole-body scans, in detecting recurrence of an adult adrenal neuroblastoma. *Hellenic Journal of Nuclear Medicine*. 2014;17:58-61.
- A75. Stevens PL, Johnson DB, Thompson MA, Keedy VL, Frangoul HA, Snyder KM. Adult neuroblastoma complicated by increased intracranial pressure: a case report and review of the literature. *Case Reports in Oncological Medicine*. 2014;2014.
- A76. Thomas J, Freedman L, Kumar SC, Hupart KH. Bilateral Adrenal Neuroblastoma in a Geriatric Patient with Elevated Catecholamine Metabolites. *Endocrine Reviews* 2014;35:0770.
- A77. Rogowitz E, Babiker HM, Kanaan M, Millius RA, Ringenberg QS, Bishop M. Neuroblastoma of analysis. *Experimental Hematology & Oncology*. 2014;3:1-7.
- A78. Febrero B, Ríos A, Rodríguez JM, Flores B, Parrilla P. Retroperitoneal neuroblastoma in the adult. An uncommon entity. *Cirugia espanola*. 2015;93:e147-8.
- A79. Liu QL, Liang QL, Ou WT, Li ZY, Zhang XN. Surgical resection and post-operative radiotherapy in an adult renal neuroblastoma patient with multiple bone and joint metastases: A case report. *Oncology Letters*. 2015;9:2591-4.
- A80. Wiesel O, Bhattacharyya S, Vaitkevicius H, Prasad S, McNamee C. Ataxia induced by a thymic neuroblastoma in the elderly patient. *World Journal of Surgical Oncology*. 2015;13:1-6.
- A81. Daboussi S, Moetemri Z, M'hamdi S, Aichaouia C, Khadraoui M, Cheikh R. Mediastinal neuroblastoma: Unusual localization with late revelation. *Revue de Pneumologie Clinique*. 2016;72:353-8.
- A82. -Oleksy M, Wachowiak- - Migaj E. Unresectable heart neuroblastoma in an adult: a natural follow-up. *Pol Arch Med Wewn*. 2016;126:365-6.
- A83. Kurokawa S, Mizuno K, Nakane A, et al. Adrenal neuroblastoma in an adult: effect of radiotherapy on local progression after surgical removal. *Case Reports in Urology*. 2016;2657632.
- A84. Rais F, Benhmidou N, Rais G, et al. Neuroblastoma in an adult: a case report of a rare entity with a summary review. *International Journal of Surgery and Medicine*. 2018;4:53.
- A85. He Y, Yao M, Zhang X, Sun P, Gao H. A very rare adult case of cervical neuroblastoma. *International Journal of Clinical and Experimental Pathology*. 2017;10:8746.
- A86. Jain TK, Ashwathanarayana AG, Basher RK. A rare adult renal neuroblastoma better imaged by 18 68 F-FDG than by Ga-dotanoc in the PET/CT scan. *Hellenic Journal of Nuclear Medicine*. 2017;20:100-1.
- A87. Malik D, Jois A, Singh H, Bora GS, Basher RK, Mittal BR. Metastatic neuroblastoma in adult patient, presenting as a super scan on 68Ga-DOTANOC PET/CT imaging. *Clin Nucl Med* 2017;42:697-9.
- A88. Huang MD, Hsu LS, Chuang HC, et al. Adult renal neuroblastoma: a case report and literature review. *Medicine*. 2018;97;1-5.
- A89. Ma X, Yang Y, Wang Z, et al. Surgical removal of adult recurrent neuroblastoma located in the posterior mediastinum and retroperitoneum: a case report. *Medicine*. 2018;97;50.
- A90. Manoharan J, Wiese D, Maurer E, et al. Left side adrenal mass mimicking a pheochromocytoma. *Langenbeck's Archives of Surgery*. 2018;403:903-916.
- A91. Wu XL, Dai YJ, Sun GY, et al. Adult neuroblastoma in the retroperitoneum: a case report. *Medicine*. 2018;97;51;1-4.
- A92. Martinez-Ciarpaglini C, Machado I, Yoshida A, et al. Extra-adrenal adult neuroblastoma with aberrant germ cell marker expression: maturation after chemotherapy as an important clue to a challenging diagnosis. *International Journal of Surgical Pathology*. 2019;27:568-73.
- A93. Naeem M, Maluf H, Baker JC, Jennings JW. Primary osseous sacral neuroblastoma in an adult. *Skeletal Radiology*. 2019;48:985-8.

- A94. Ramsingh J, Casey H, Watson C. Adult neuroblastoma: a rare diagnosis of an adrenal mass. *BMJ Case Reports CP*. 2019;12:e228730.
- A95. Tan YB, Li JF, Li WS, Yang RL. Primary thoracic neuroblastoma in an adult: a rare case report. *Medicine*. 2019;98;1-4.
- A96. Yanik F, Karamustafaoglu YA, Yoruk Y. A rare mediastinal occurrence of neuroblastoma in an adult: case report. *Sao Paulo Medical Journal*. 2018;137:104-6.
- A97. Zhang H, Feng Z. Adrenal neuroblastoma in an elderly adult: a case report and review of the literature. *Journal of Medical Case Reports*. 2019;13:1-4.
- A98. Bukhari N, Harfouch B, Alotaibi MS, Al-Harbi H, Chamdine O. Immediate response to chemotherapy in an adult neuroblastoma patient presenting with cord compression. *Case Reports in Neurological Medicine*. 2020;6401497.
- A99. Findakly D, Nguyen E, Wang J. Clinical features and outcomes of neuroblastomas in adults. *Journal of Clinical Oncology*. 2020;38;15(suppl):e14546.
- A100. Nawata A, Izumi R, Harada K, et al. An elderly-onset neuroblastoma concomitant with minimal change nephrotic syndrome: the first autopsy case report. *CEN Case Reports*. 2021;10:414-21.
- A101. Xu S, Zhang W, Che B, et al. Adult adrenal neuroblastoma: A case report. *Molecular and Clinical Oncology*. 2021;15:1-4.
- A102. Gómez GE, Urbano MA, Martínez V. Adrenal Neuroblastoma Producing Catecholamines Diagnosed in Adults: Case Report. *Case Reports in Oncology*. 2022;15:682-6.
